# Supplementary material for: 3D pomegranate-like TiN@graphene composites with electrochemical reaction chambers as sulfur hosts for ultralong-life lithium–sulfur batteries
Source: Royal Society of Chemistry journal article supplement (doi:10.1039/c8nh00343b), 2018-12-06
Supplement: c8nh00343b1.pdf [file c8nh00343b1.pdf]

## Information

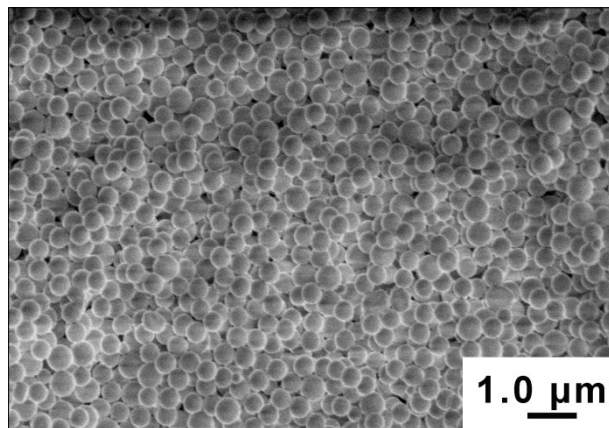

**Fig. S1** SEM image of sulfonated polystyrene spheres (sPS).

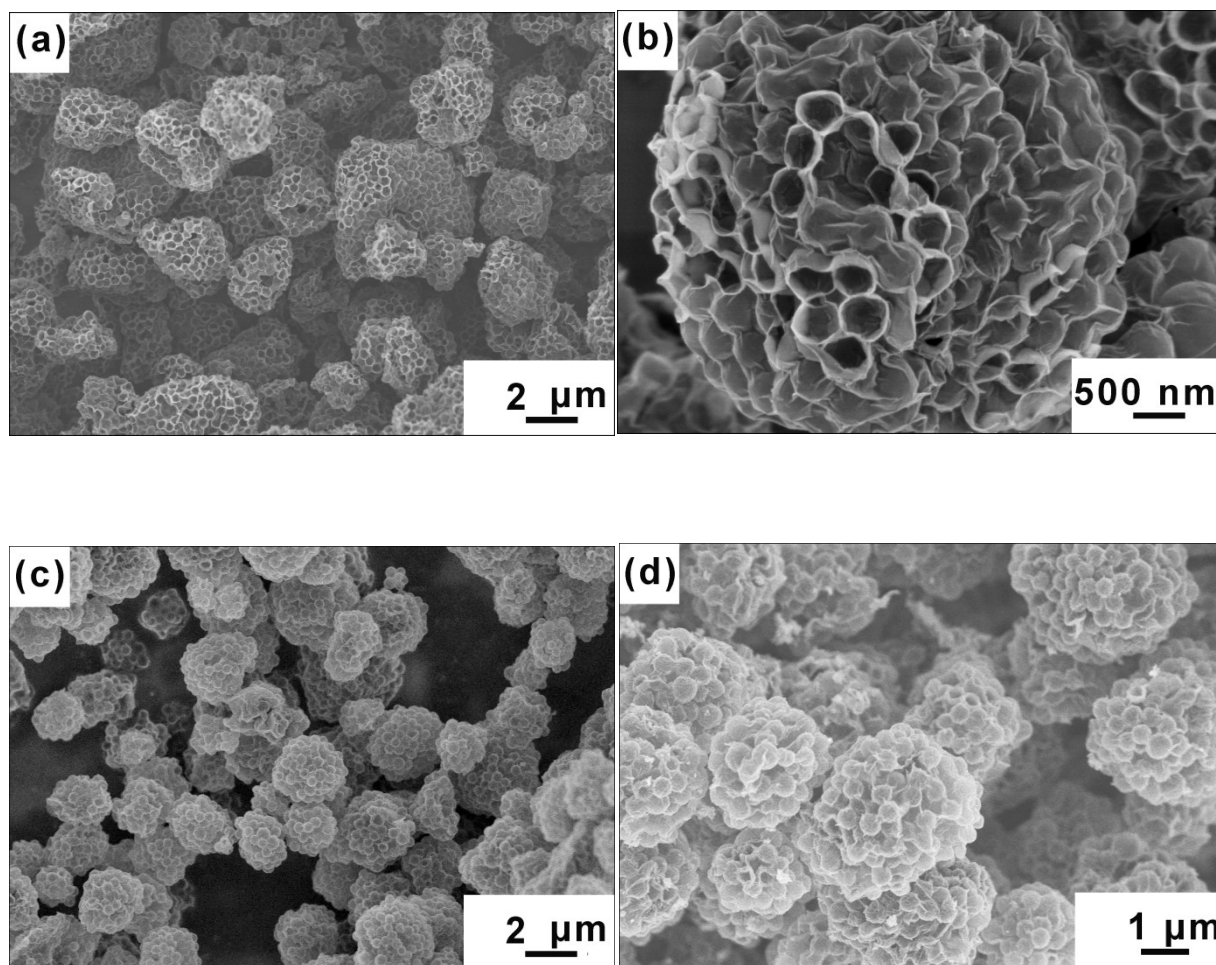

**Fig. S2** SEM images of (a, b) PG and (c, d) PTG composites.

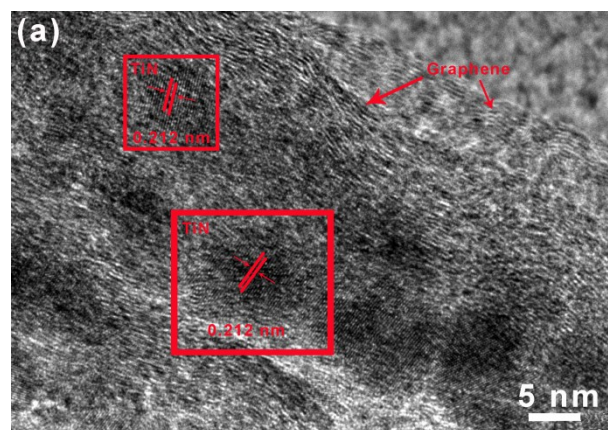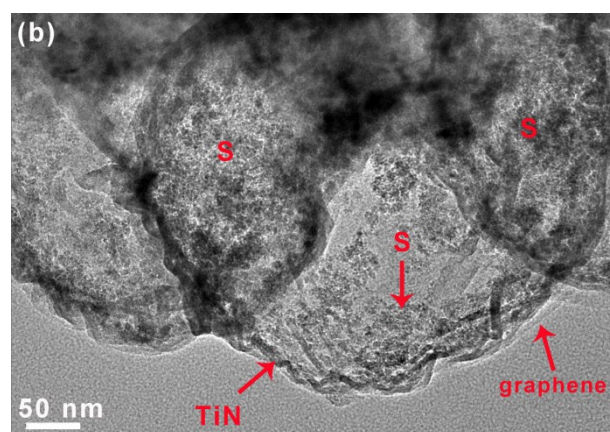

**Fig. S3** (a) High-resolution TEM (HRTEM) image of PTG composites; (b) TEM image of PTG/S composites.

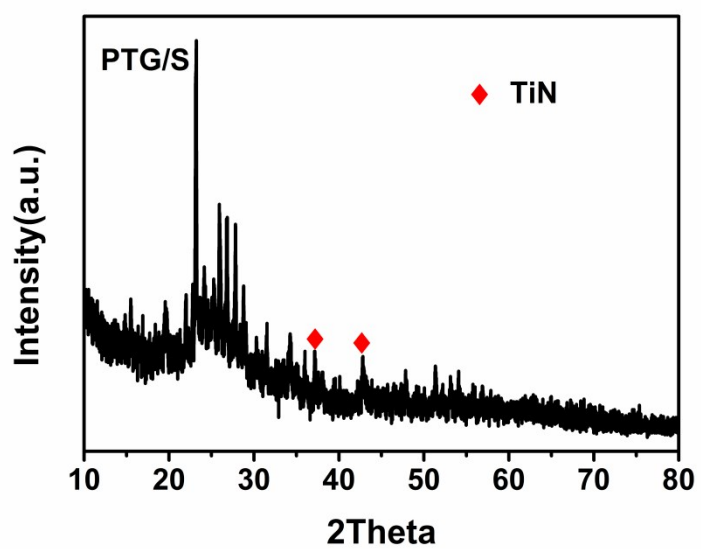

**Fig. S4** XRD pattern of PTG/S composites.

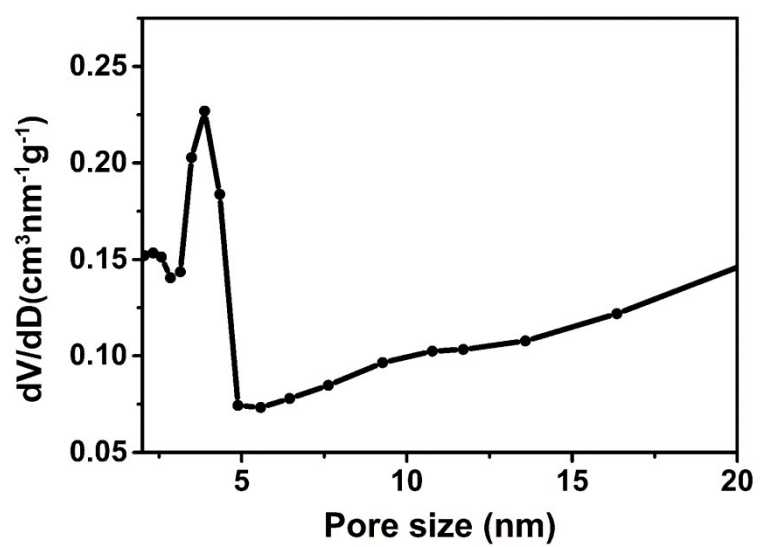

**Fig. S5** Pore size distribution curve of PTG composites.

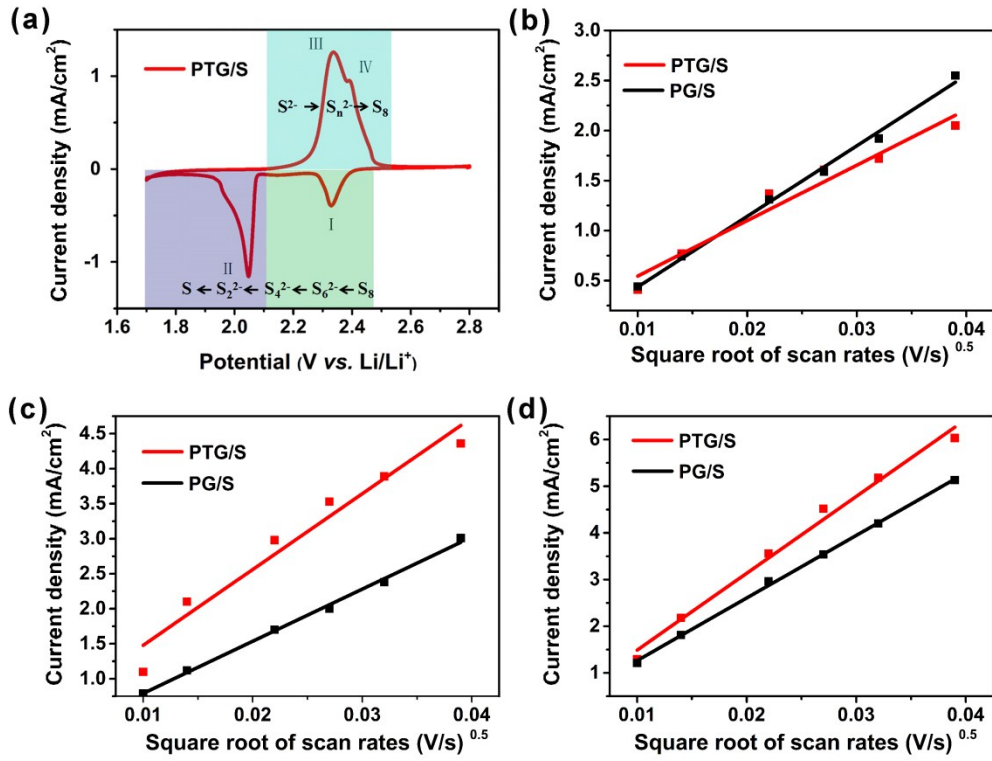

**Fig. S6** (a) CV curves of PTG/S cathodes in the range of 1.7-2.8 V at a sweep rate of  $0.1 \text{ mV s}^{-1}$ ; and linear plots of peak current vs square root of scan rate of (b) cathodic reaction I ( $\text{S}_8\text{-Li}_2\text{S}_4$ ), (c) cathodic reaction II ( $\text{Li}_2\text{S}_4\text{-Li}_2\text{S}$ ), and (d) anodic reaction III ( $\text{Li}_2\text{S-S}_8$ ) of PG/S and PTG/S cathodes.

CV tests for the two electrodes were performed at different sweep rates of 0.1, 0.2, 0.5, 0.75, 1 and  $1.5 \text{ mV s}^{-1}$  (**Fig. 4b and c**). The peak currents have a linear response with the square root of scan rate, according to the Randles-Sevcik equation:

$$I_p = (2.69 \times 10^5) n^{3/2} A D^{1/2} \nu^{1/2} C_0 \quad (\text{S1})$$

in which  $I_p$  is the peak-current,  $n$  is the number of electrons during the redox reaction,  $A$  is the active area of the corresponding electrode,  $D$  is the lithium ion diffusion coefficient,  $\nu$  is the scan rate and  $C_0$  is the molar concentration of lithium ions. The  $n$ ,  $A$  and  $C_0$  are constant for a battery system.

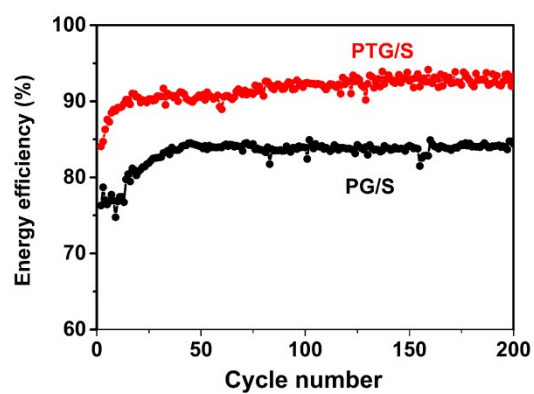

**Fig. S7** Energy efficiencies of PTG/S and PG/S cathodes at a current density of 0.5 C.

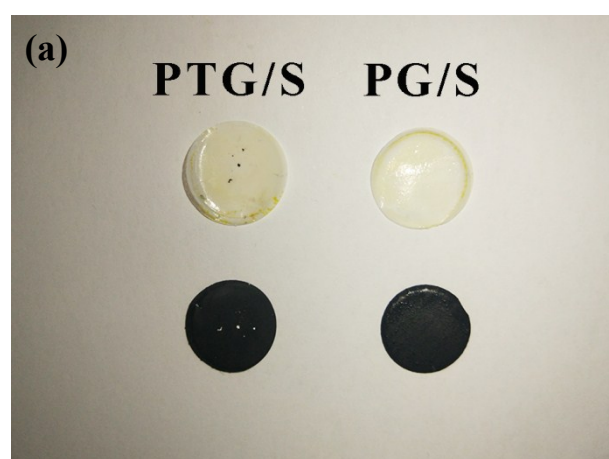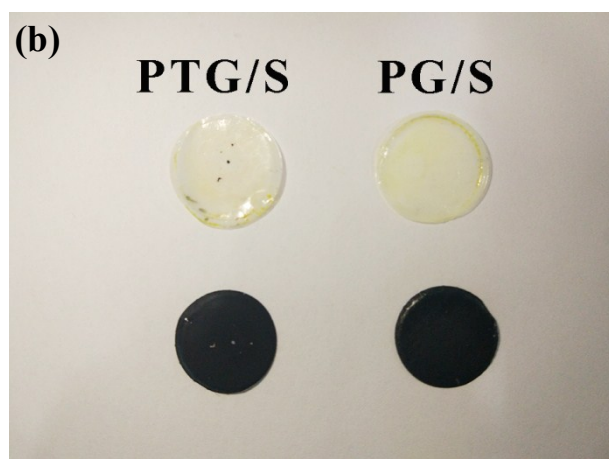

**Fig. S8** Optical images of separators in the PTG/S and PG/S cells: (a) front side of the separator facing the cathode ; (b) back side of the separator.



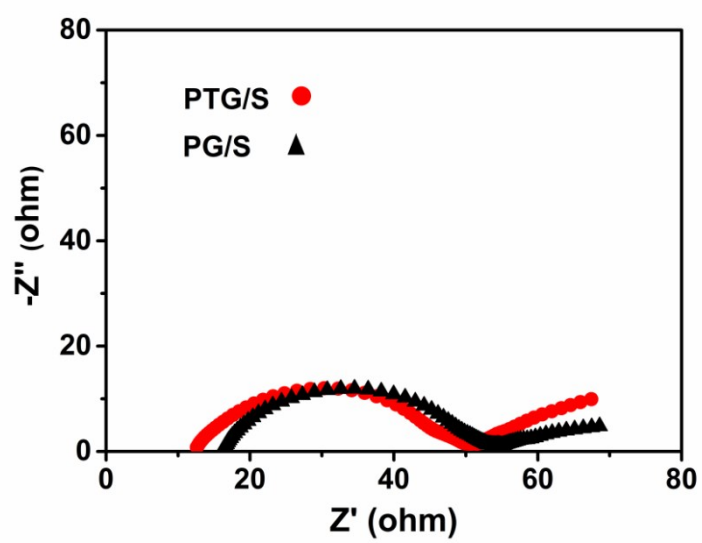

**Fig. S9** Nyquist plots of fresh PG/S and PTG/S cathodes.

**Table S1** Elemental compositions of PG and PTG composite.

|            | <b>Ti</b> | <b>N</b> | <b>C</b> | <b>O</b> |
|------------|-----------|----------|----------|----------|
| <b>PG</b>  | -         | 9.0%     | 86.4%    | 4.5%     |
| <b>PTG</b> | 1.64%     | 4.6%     | 88.6%    | 5.2%     |

**Table S2** Impedence parameters of PG/S and PTG/S composites before and after 100 and 200 cycles.

| <b>Cycle</b> | <b>PG/S (<math>\Omega</math>)</b> |       |          | <b>PTG/S (<math>\Omega</math>)</b> |       |          |
|--------------|-----------------------------------|-------|----------|------------------------------------|-------|----------|
|              | $R_o$                             | $R_s$ | $R_{ct}$ | $R_o$                              | $R_s$ | $R_{ct}$ |
| 0            | 15.6                              | -     | 33.4     | 12.2                               | -     | 35.2     |
| 100          | 3.5                               | -     | 35.9     | 6.1                                | 4.9   | 14.86    |
| 200          | 4.5                               | -     | 47.3     | 10.6                               | 5.0   | 24.9     |
